# Supplementary material for: Novel N-Black In2O3−x/InVO4 heterojunction for efficient photocatalytic fixation: synergistic effect of exposed (321) facet and oxygen vacancy
Source: Royal Society of Chemistry journal article supplement (doi:10.1039/d1ta08257d), 2021-01-01
Supplement: d1ta08257d1.pdf [file d1ta08257d1.pdf]

# Novel N-Black $\text{In}_2\text{O}_{3-x}/\text{InVO}_4$ heterojunction for efficient photocatalytic fixation: Synergistic effect of exposed (321) facet and oxygen vacancy

Jin Ye,<sup>a</sup> Jiating Xu,<sup>\*a</sup> Chunsheng Li,<sup>a</sup> Di Tian,<sup>b</sup> Xiaohan Zhao,<sup>c</sup> Qiang Wang,<sup>a</sup> Wubin Lv,<sup>a</sup> Jun Wang,<sup>a</sup> Haijiao Xie,<sup>c</sup> Yudong Li,<sup>d</sup> Zhiguo Liu,<sup>a</sup> and Yujie Fu<sup>\*a</sup>

<sup>a</sup> Key Laboratory of Forest Plant Ecology, Ministry of Education, College of Chemistry, Chemical Engineering and Resource Utilization, Northeast Forestry University, Harbin 150040, P. R. China

<sup>b</sup> Key Laboratory of Jiangxi Province for Persistent Pollutants Control and Resources Recycle, Nanchang Hangkong University, Nanchang 330063, P. R. China

<sup>c</sup> Jiangsu Key Laboratory of Advanced Catalytic Materials and Technology, School of Petrochemical Engineering, Changzhou University, Changzhou 213164, PR China

<sup>d</sup> Key Laboratory of Bio-Based Material Science and Technology of Ministry of Education, Northeast Forestry University, Harbin, 150040, P. R. China

<sup>e</sup> Hangzhou Yanqu Information Technology Co. Ltd, Xihu District, Hangzhou 310003, P. R. China

## 1. Characterization

The structures of the composites were recorded at a scanning rate of 12 °/min using X-ray diffraction (XRD, D8 Focus) with Cu K $\alpha$  radiation ( $\lambda=1.5406$  Å). The morphology of the composite was observed by scanning electronic micrograph (SEM, Nova Nano SEM 450) and Transmission electron microscope (TEM, FEI TalosF200x). The optical property of the composite was characterized using UV-visible (UV-vis) diffuse reflectance spectroscopy (Varian Cary300). Photoluminescence (PL) spectroscopy was recorded *via* an Agilent Cary Eclipse (F-7000) at room temperature. Time-resolved photoluminescence (TRPL) spectra for samples were conducted from 350 to 600 nm with a photoluminescence spectrometer (QM8000) at an excitation 325 nm. BaSO<sub>4</sub> was used as a reflectance standard in the UV-vis diffuse reflectance experiment. The chemical composition and element valence were analyzed using X-ray photoelectron spectroscopy (XPS, Kratos Axis Ultra) with a monochromated Al K $\alpha$  X-ray source ( $h\nu=1486.6$  eV). Raman spectroscopy was carried out by Confocal Laser Raman Spectrometer (DXR Raman) at an excitation 532 nm. N<sub>2</sub> adsorption-desorption isotherm measurements were investigated to study the Brunauer-Emmett-Teller (BET) specific surface areas of the samples. All electrochemical and photoelectrochemical characterizations were performed on an electrochemical workstation (CHI760E) using a three-electrode system (pH 7.0) with Pt as the counter electrode, Ag/AgCl as the reference electrode, and ITO as the working electrode under visible light. In Mott-Schottky plots, the test frequency is 500, 1000 and 1500 Hz and the potential range is -1 to 0.8 V. The

electron spin resonance (ESR) spectra were performed on a Bruker A300 spectrometer at room temperature. Transient photocurrent response measurements were tested on an electrochemical workstation in the saturated solution of Na<sub>2</sub>SO<sub>4</sub> (0.5 M) with 20 s interval under visible light by controlling the light on and off. The in situ diffuse reflectance fourier transform infrared spectroscopy (In-situ DRFTIRS) spectra were investigated by in situ FTIR spectrometer (Thermo iS50FT-IR) with MCT detector and designed reaction cell. Electrochemical impedance spectroscopy (EIS) was carried out in the frequency range of 0.01 to 10<sup>5</sup> Hz by electrochemical workstation with Nafion solution. Nitrogen temperature-programmed desorption (N<sub>2</sub>-TPD) was conducted on a Micromeritics AutoChem II 2920 instrument. The concentrations of NH<sub>4</sub><sup>+</sup>, NO<sub>3</sub><sup>-</sup> and NO<sub>2</sub><sup>-</sup> was quantified by ion chromatography (930 compact IC Flex, Metrohm). UV-vis absorption spectra of the samples were recorded on a Shimadzu UV-2550 UV-vis spectrometer. The 300W Xenon lamp (PLS-SXE 300, Beijing Perfect Light Co., Ltd.) was used as the light source. The products from isotopic labeling experiments were analyzed by high-resolution mass spectrometry (Bruker Apex IV Fourier Transform Mass Spectrometer). And Ultraviolet photoemission spectroscopy (UPS) measurements were performed on a Thermo Fisher ESCALAB 250Xi instrument with a He radiation source (hν = 21.2 eV). From UPS spectra, the work function Φ of sample was calculated according to the equation  $\Phi = h\nu - (E_{\text{Fermi}} - E_{\text{cutoff}})$ , in which hν is the He I energy (21.2 eV).<sup>1</sup>

## **2. Photocatalytic N<sub>2</sub> fixation performance test**

Photocatalytic N<sub>2</sub> fixation performance for all sample were investigated by all glass

automatic on-line trace gas analysis system (Labsolar 6A, Beijing Perfectlight Technology Co., Ltd.) with ambient conditions under visible light using 300 W Xenon lamp as light source. In a simple experiment, 50 mg photocatalyst and 100 mL deionized water were added into the reactor to form a uniform suspension *via* sonication. After that, a circulating water system was carried out to maintain room temperature. Subsequently, high-purity nitrogen was bubbled into the above solution in darkness for 30 min with continuously stirring and then reacted under light irradiation with 300 W Xe lamp. Finally, 5 mL of the suspension was withdrawn per 30 min and the liquid sample was filtered through 0.22  $\mu\text{m}$  filter to remove the photocatalyst. Nessler's reagent was used as chromogenic agent, and the concentration of  $\text{NH}_4^+$  was tested at 420 nm in the spectrophotometer.

### **3. Isotopic labeling experiments**

Isotopic labeling experiments were performed to further verify the nitrogen source of  $\text{NH}_4^+$  originated from dissolved  $\text{N}_2$  using  $^{15}\text{N}_2$  by the indophenol blue method. Isotopic labeling experiments were similar to above photocatalytic  $\text{N}_2$  fixation performance test. The catalyst suspension (including 50 mg photocatalyst and 100 mL deionized water) was continuously stirred in the dark. Then, high-purity Ar was bubbled through the suspension for 30 min to remove dissolved  $\text{N}_2$  in the aqueous suspension. Furthermore,  $^{15}\text{N}_2$  was continuously bubbled in reaction solutions. The reaction solutions were analyzed through the Nessler's reagent. The products were analyzed by high-resolution mass spectrometry (Bruker Apex IV Fourier Transform Mass Spectrometer) and  $^1\text{H}$  nuclear magnetic resonance ( $^1\text{H}$ NMR, JEOL JNM-

ECZ400S).

#### **4. Free radical capture experiment**

Free radical capture experiments were employed to verify the roles of different reactive oxygen species. In a typical method, 10 mg of photocatalyst was suspended in 100 mL aqueous solution of MB (10 mg/L). After 30 min of adsorption/desorption equilibrium, the photocatalytic degradation of MB was initiated by irradiating the reaction mixture with different scavengers such as tert-butanol (t-BuOH), benzoquinone (BQ), and disodium ethylenediaminetetraacetate (EDTA) as scavengers for  $\cdot\text{OH}$ ,  $\cdot\text{O}_2^-$  and  $\text{h}^+$  were added into the photocatalytic reaction process, respectively. Photodegradation was monitored by measuring the absorbance of the solution at 664 nm.

#### **5. ESR spin-trapping experiments**

In a typical experiment, 20 mg of photocatalyst was dispersed in 5 mL of ultrapure water/methyl alcohol under ultrasonic for 30 min. Then, 10  $\mu\text{L}$  of 5,5-dimethyl-1-pyrroline-N-oxide (DMPO) and 2,2,6,6-Tetramethylpiperidine (TEMP) were added into above solution for  $\cdot\text{OH}$  and  $\cdot\text{O}_2$  with ultrasonic dispersion, respectively. The sample was loaded in a capillary tube and further placed into a quartz nuclear magnetic tube before subjecting to ESR test.

#### **6. Computational methods**

We have employed the Vienna Ab initio Simulation Package (VASP) to perform all density functional theory (DFT) calculations within the generalized gradient approximation (GGA) using the Perdew-Burke-Ernzerhof (PBE) functional. We have

chosen the projected augmented wave (PAW) potentials to describe the ionic cores and take valence electrons into account using a plane wave basis set with a kinetic energy cutoff of 400 eV. Geometry optimizations were performed with the force convergency smaller than 0.03 eV/Å. The original bulk structures  $\text{In}_2\text{O}_3$  has been optimized before the construction of surfaces with the Monkhorst-Pack k-point of  $2 \times 2 \times 2$ . The  $\text{In}_2\text{O}_3$  (321) surfaces with 48 In and 72 O atoms and  $\text{In}_2\text{O}_3$  (222) surfaces with 48 In and 72 O atoms were applied with half of the surface at the bottom fixed in all the calculations. The oxygen vacancy on the  $\text{In}_2\text{O}_3$  (321) and  $\text{In}_2\text{O}_3$  (222) surface was created by removing two surface O atom from the perfect surface. Monkhorst-Pack k-points of  $2 \times 2 \times 1$  and  $1 \times 2 \times 1$  were applied for all the surface calculations for  $\text{In}_2\text{O}_3$  (222) and  $\text{In}_2\text{O}_3$  (321), respectively. The surface energy of (222) and (321) planes for  $\text{In}_2\text{O}_3$  were determined as follows:

$$E(\text{total}) = E(\text{perfect}) - E(\text{O}_2) - 2 \times E(\text{bulk})/3 \quad (1)$$

$$E(\text{surface energy}) = E(\text{total})/(\text{surface area} \times 2) \quad (2)$$

(Where  $E(\text{total})$ ,  $E(\text{perfect})$ ,  $E(\text{O}_2)$  and  $E(\text{bulk})$  are total energy, energy of perfect surface, energy of  $\text{O}_2$  and bulk energy of  $\text{In}_2\text{O}_3$ , respectively.)

Of course, calculation of adsorption energy for  $\text{NH}_3$  of different crystal planes for  $\text{In}_2\text{O}_3$  were determined as follows:

$$E(\text{adsorption energy}) = E(\text{absorb+slab}) - E(\text{slab}) - E(\text{N}_2/\text{NH}_3) \quad (3)$$

(Where  $E(\text{absorb+slab})$ ,  $E(\text{slab})$  and  $E(\text{N}_2/\text{NH}_3)$  are the energy of adsorbed system, the energy of the clean substrate surface and the energy of the adsorbates, respectively.)

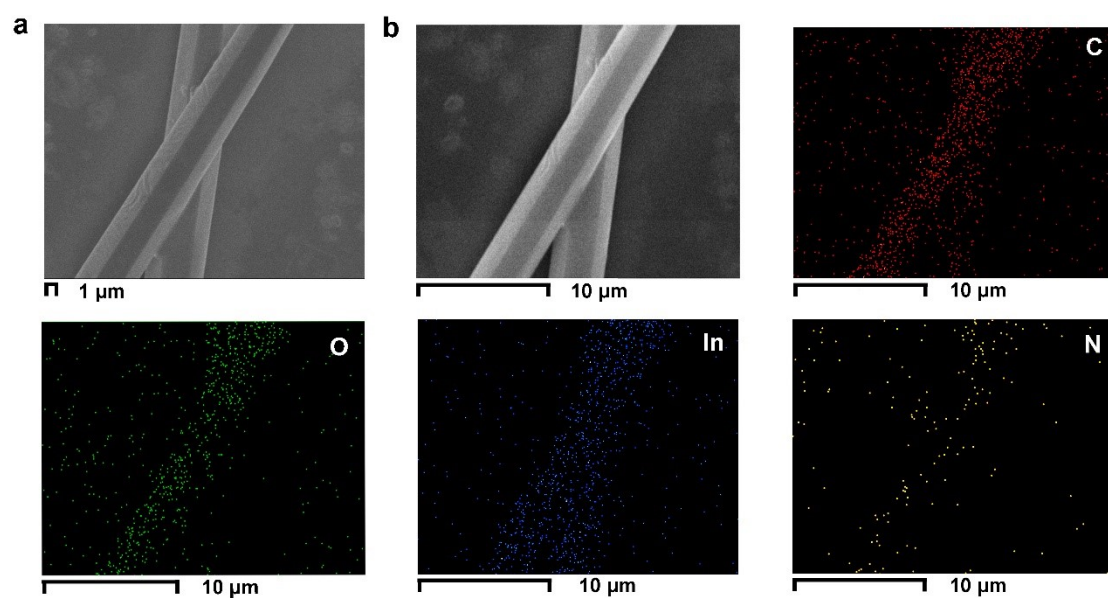

**Fig. S1** SEM images of the  $\text{NH}_2\text{-MIL-68}$  (a, b) and corresponding EDS mapping.

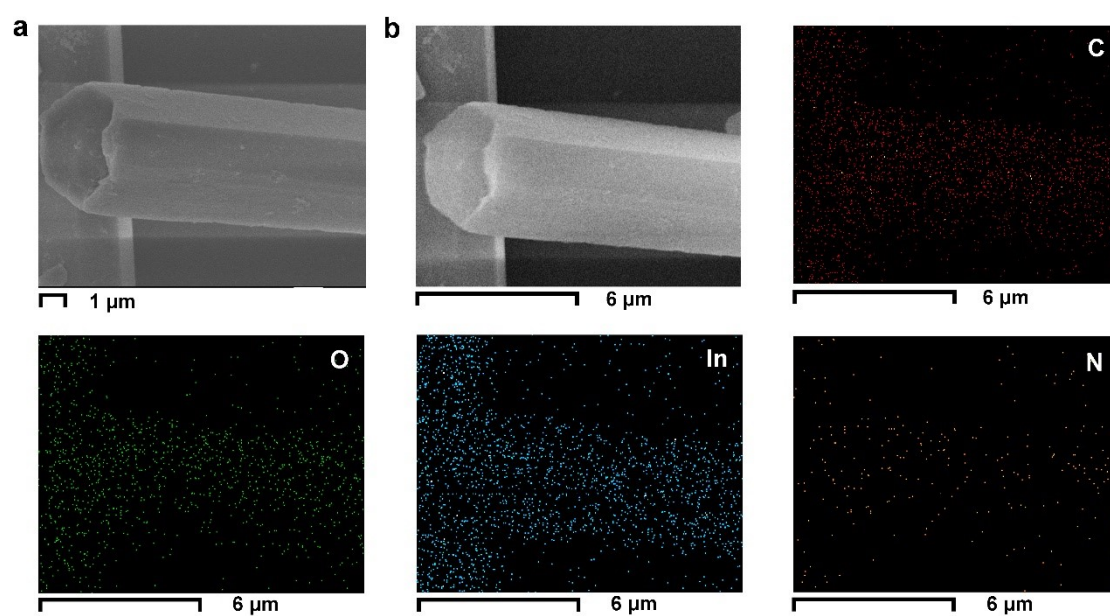

**Fig. S2** SEM images of the N-In<sub>2</sub>O<sub>3</sub> (a, b) and corresponding EDS mapping.



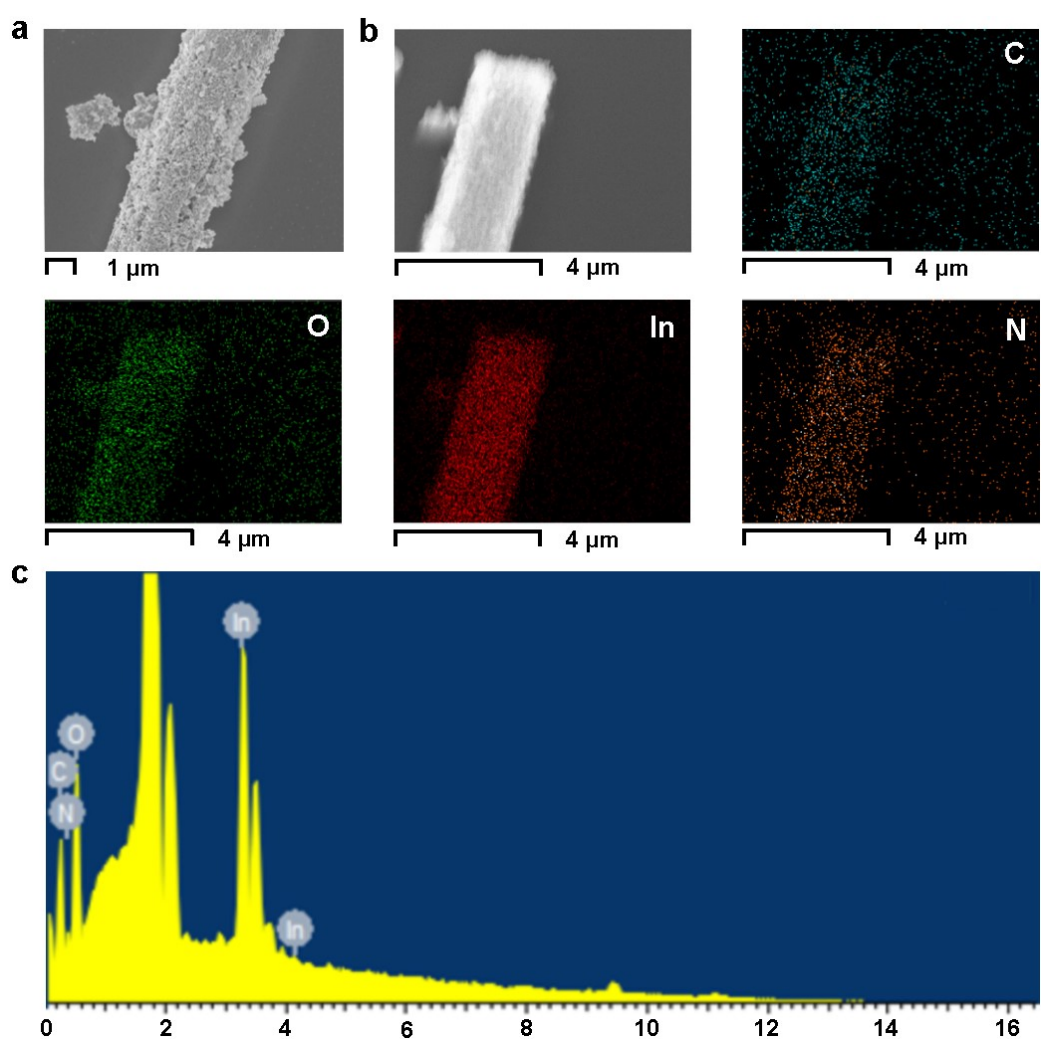

**Fig. S3** SEM images of the N-Black-In<sub>2</sub>O<sub>3</sub> (a, b) and corresponding EDS mapping, EDS of the N-Black-In<sub>2</sub>O<sub>3-x</sub> (c).

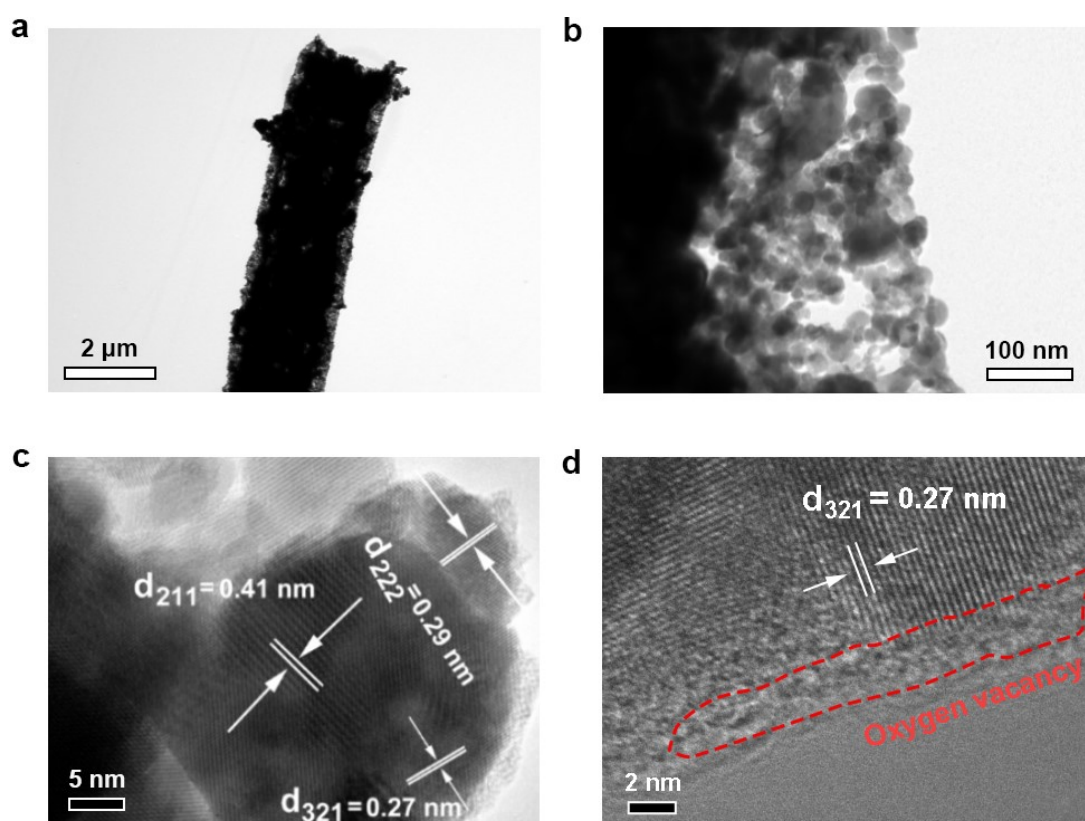

**Fig. S4** TEM (a-b) and HRTEM (c-d) images of the N-Black-In<sub>2</sub>O<sub>3-x</sub>.

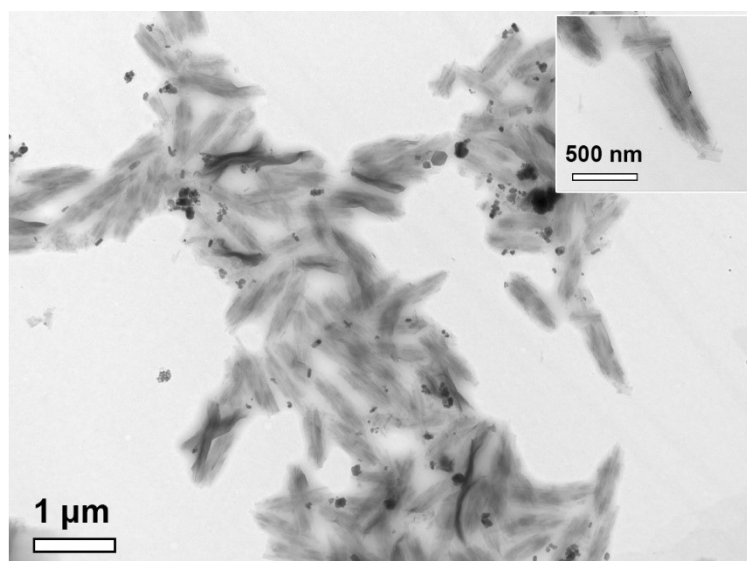

**Fig. S5** TEM images of the InVO<sub>4</sub> nanosheets and enlarge image (inset).

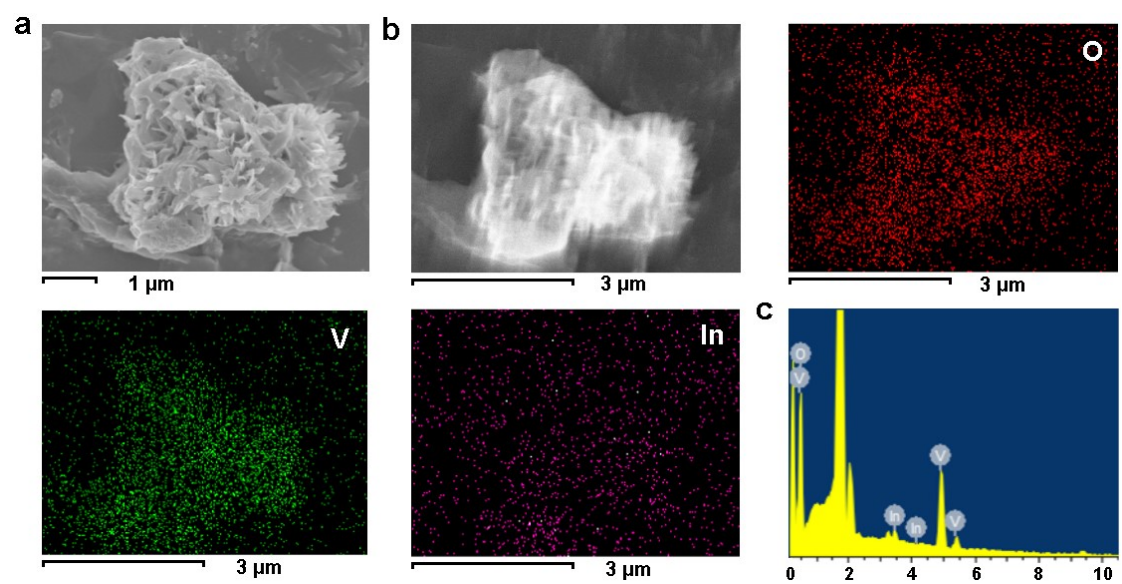

**Fig. S6** SEM images of the InVO<sub>4</sub> nanosheets (a, b) and corresponding EDS mapping, EDS of the InVO<sub>4</sub> (c).

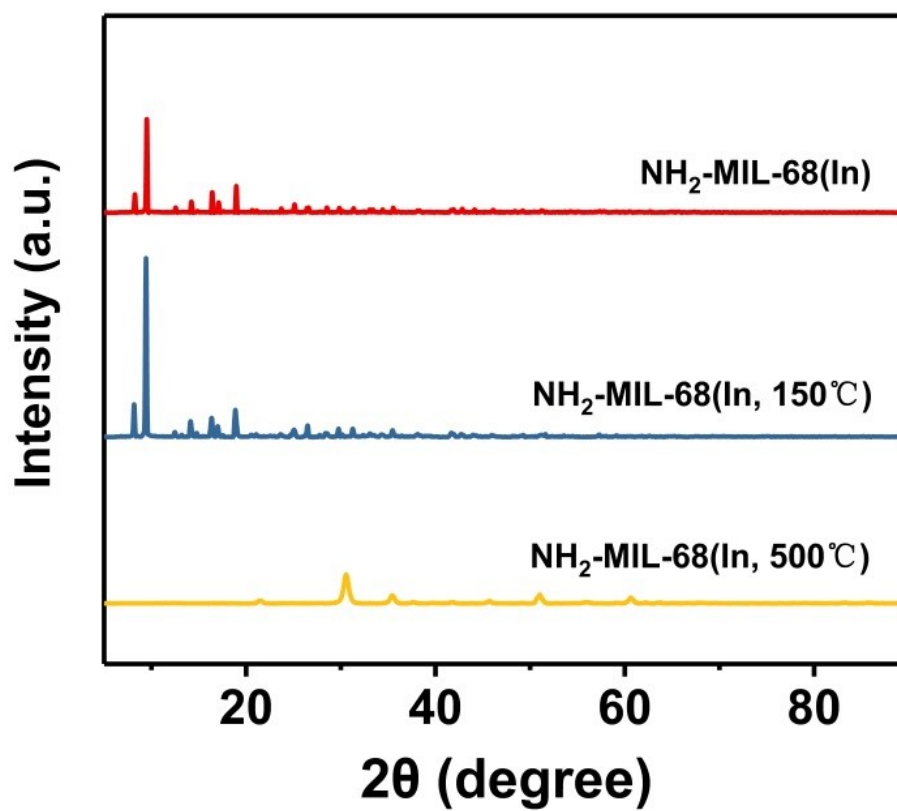

**Fig. S7** XRD patterns of NH<sub>2</sub>-MIL-68 at different calcination temperatures.

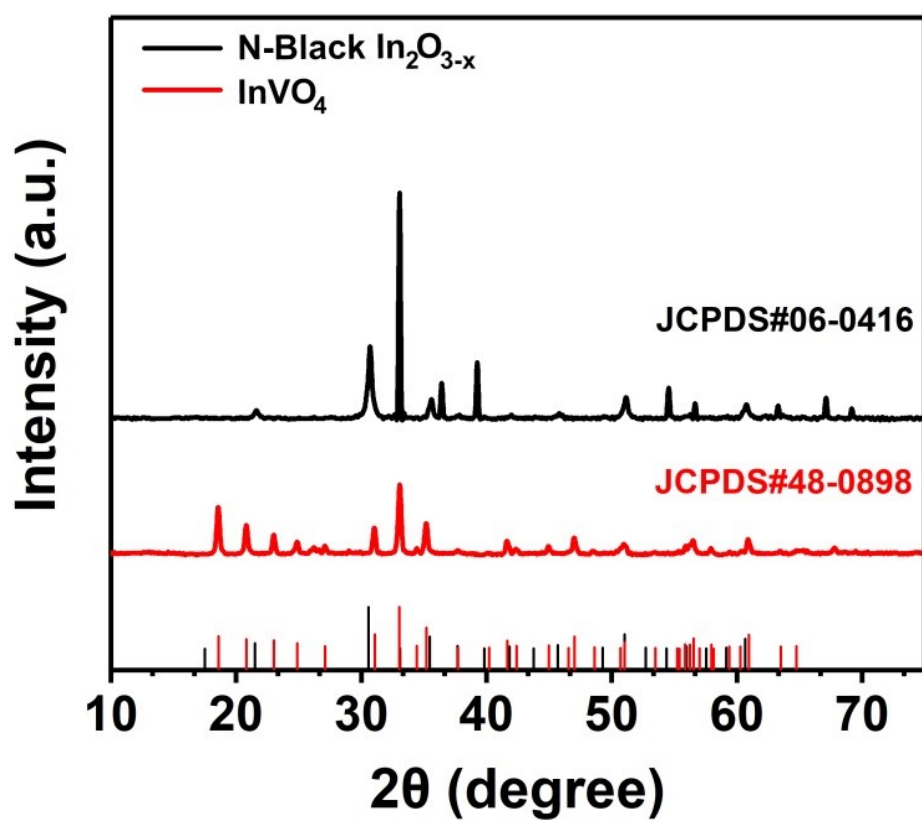

**Fig. S8** XRD patterns of N-Black  $\text{In}_2\text{O}_{3-x}$  and  $\text{InVO}_4$ .

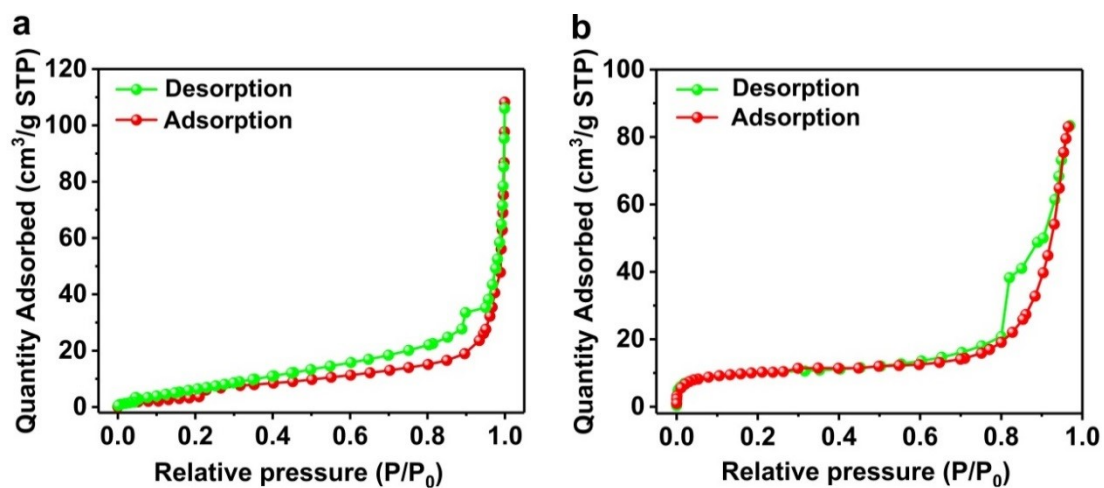

**Fig. S9** N<sub>2</sub> adsorption-desorption isotherms of N-Black In<sub>2</sub>O<sub>3-x</sub> (a), N-Black In<sub>2</sub>O<sub>3-x</sub>/InVO<sub>4</sub> (b).

**Table S1.** The specific surface area and average pore diameter for N-Black  $\text{In}_2\text{O}_{3-x}$  and N-Black  $\text{In}_2\text{O}_{3-x}/\text{InVO}_4$ .

| Sample                                            | BET surface area ( $\text{m}^2/\text{g}$ ) | Average pore diameter (nm) |
|---------------------------------------------------|--------------------------------------------|----------------------------|
| N-Black $\text{In}_2\text{O}_{3-x}$               | 37.6                                       | 13.7                       |
| N-Black $\text{In}_2\text{O}_{3-x}/\text{InVO}_4$ | 10.5                                       | 32.3                       |



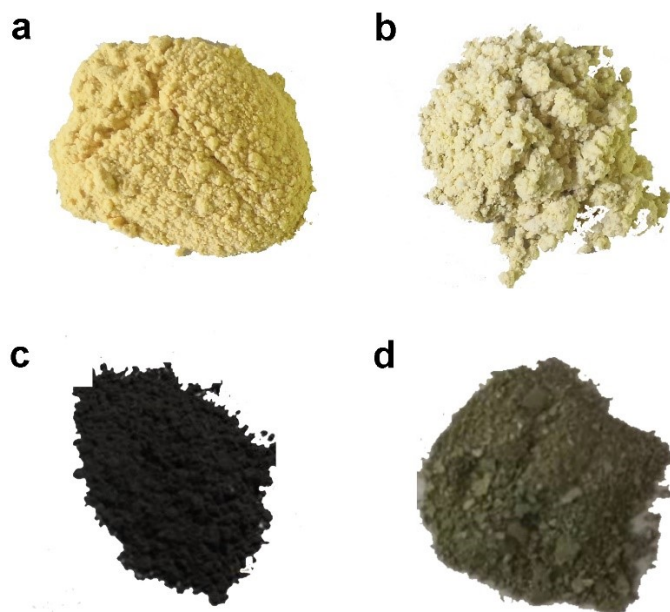

**Fig. S10** The picture of the prepared  $\text{NH}_2\text{-MIL-68}$  (a),  $\text{N-In}_2\text{O}_3$  (b),  $\text{N-Black In}_2\text{O}_{3-x}$  (c) and  $\text{InVO}_4$  (d) samples.

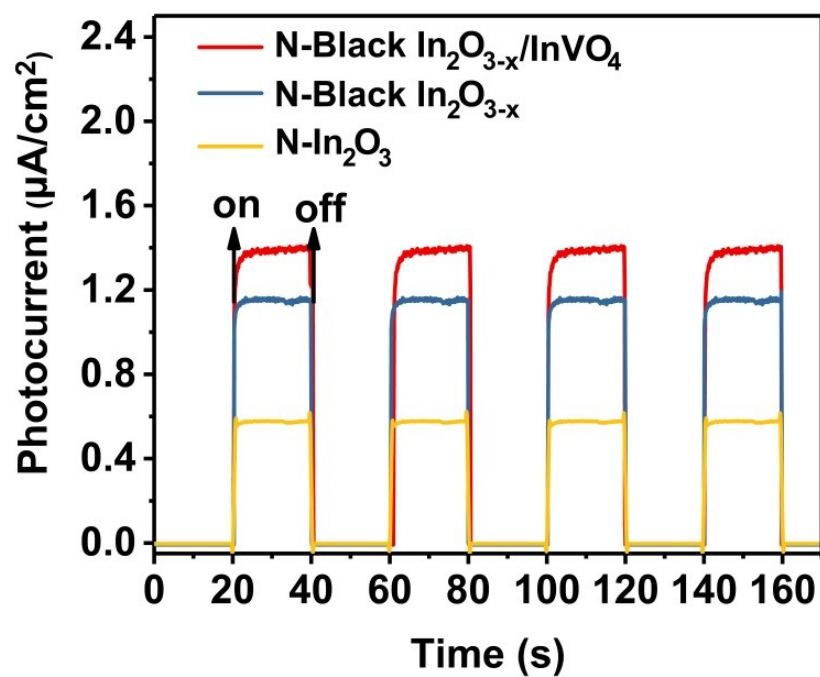

**Fig. S11** Photocurrent transient responses of N- $\text{In}_2\text{O}_3$ , N-Black  $\text{In}_2\text{O}_{3-x}$  and N-Black  $\text{In}_2\text{O}_{3-x}/\text{InVO}_4$ .

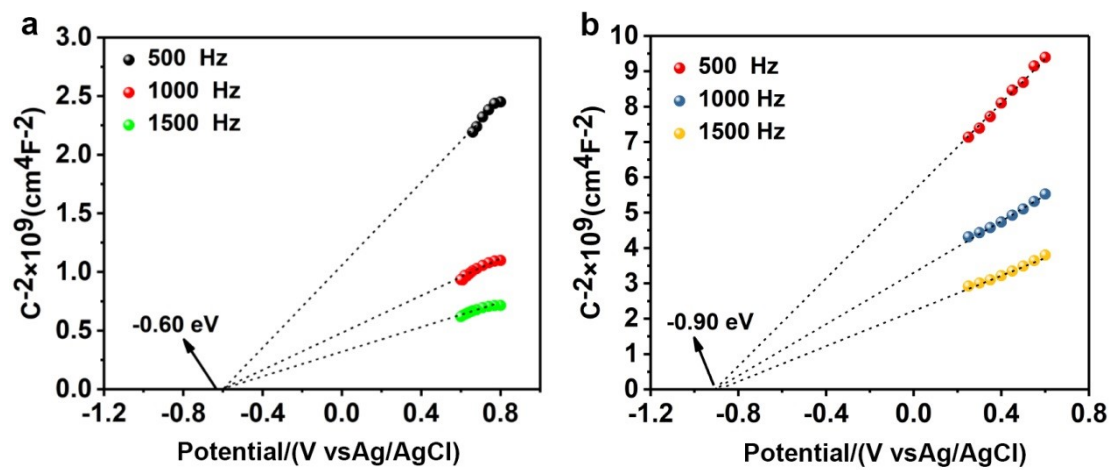

**Fig. S12** Mott-Schottky plots of N-Black  $\text{In}_2\text{O}_{3-x}$  (a) and  $\text{InVO}_4$  (b).

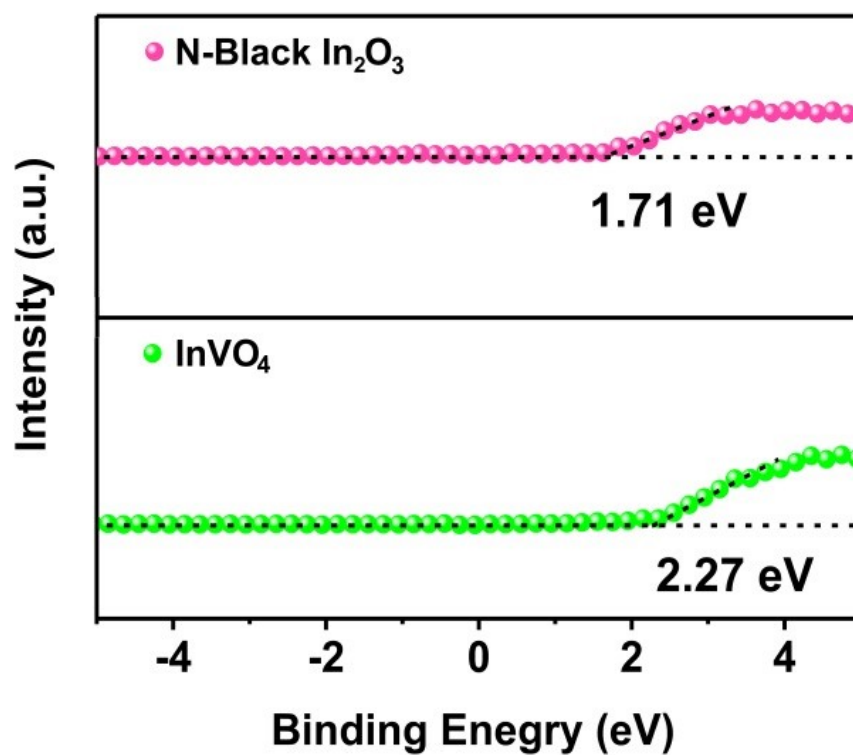

**Fig. S13** XPS valence band spectra of N-Black  $\text{In}_2\text{O}_{3-x}$  and  $\text{InVO}_4$ .

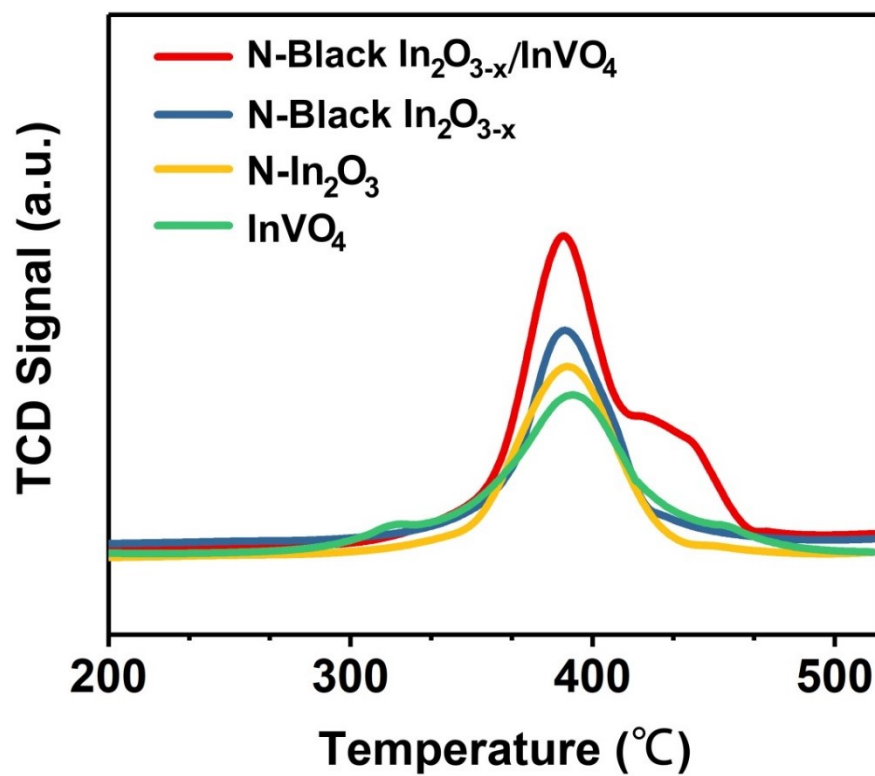

**Fig. S14**  $\text{N}_2$ -TPD profiles of the as-prepared samples

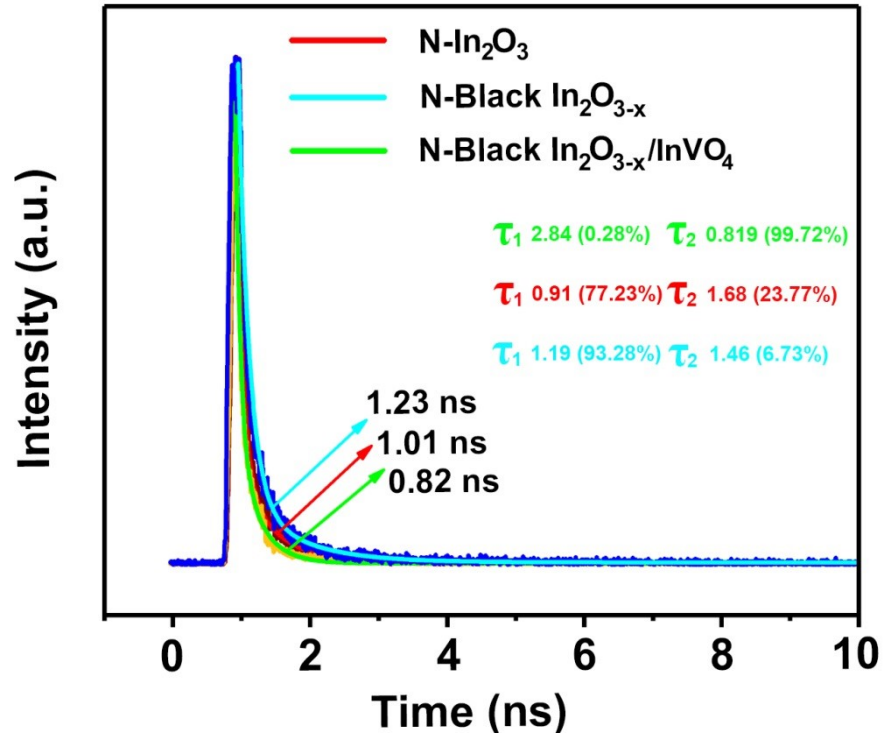

**Fig. S15** Time-resolved transient PL decay for N-In<sub>2</sub>O<sub>3</sub>, N-Black In<sub>2</sub>O<sub>3-x</sub> and N-Black In<sub>2</sub>O<sub>3-x</sub>/InVO<sub>4</sub>. Fitting parameters and results refer to the following formula:

$$\tau = \frac{A_1\tau_1^2 + A_2\tau_2^2}{A_1\tau_1 + A_2\tau_2}$$

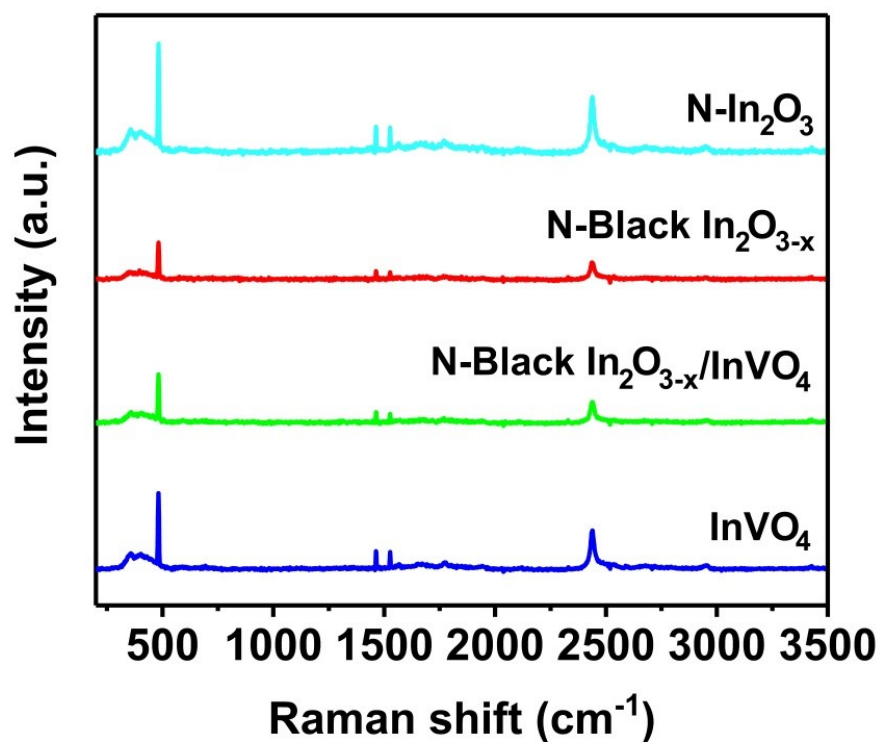

**Fig. S16** Raman spectroscopy for N-In<sub>2</sub>O<sub>3</sub>, N-Black In<sub>2</sub>O<sub>3-*x*</sub> and N-Black In<sub>2</sub>O<sub>3-*x*</sub>/InVO<sub>4</sub>.

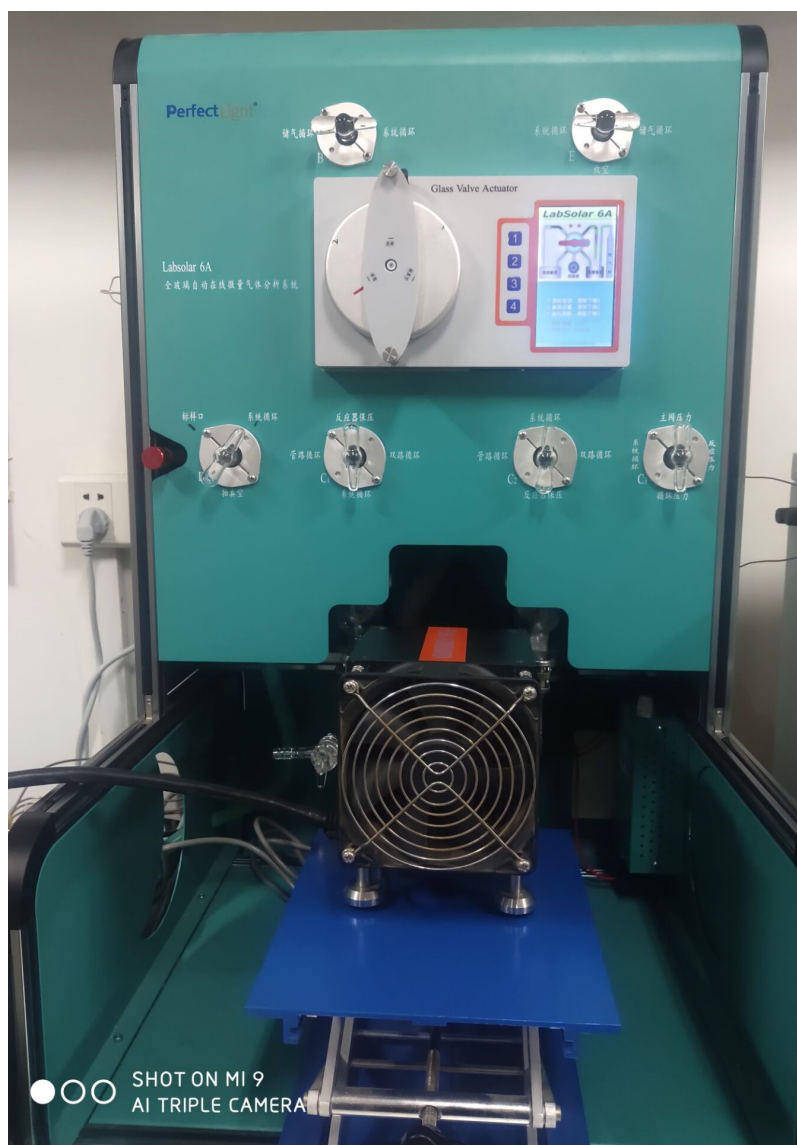

**Fig. S17** Evaluation of photocatalytic nitrogen fixation tests by Labsolar 6A.



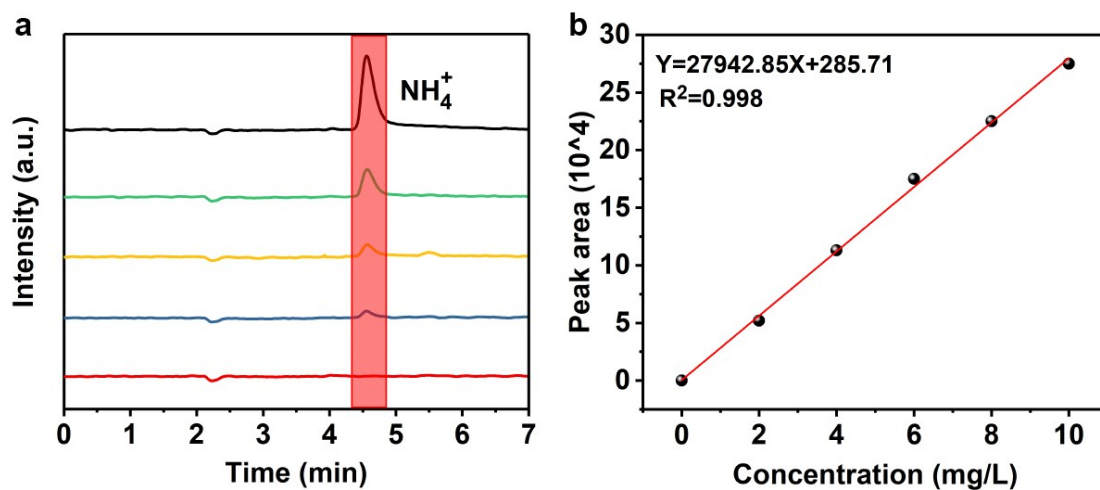

**Fig. S18** Spectra of ion chromatography for ammonia solution with different concentrations (a), the standard curve for  $\text{NH}_4^+$  detection via ion chromatography method (b).

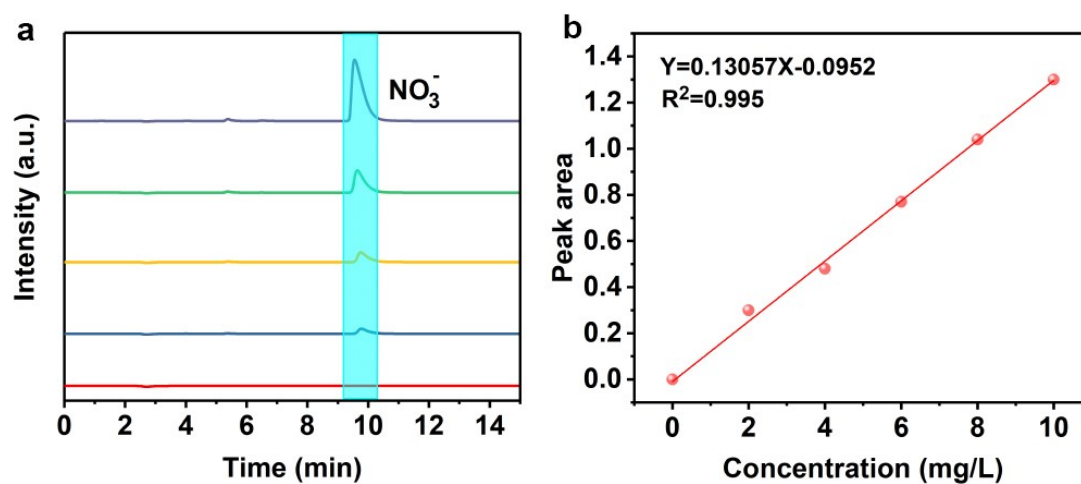

**Fig. S19** Spectra of ion chromatography for ammonia solution with different concentrations (a), the standard curve for  $\text{NO}_3^-$  detection via ion chromatography method (b).

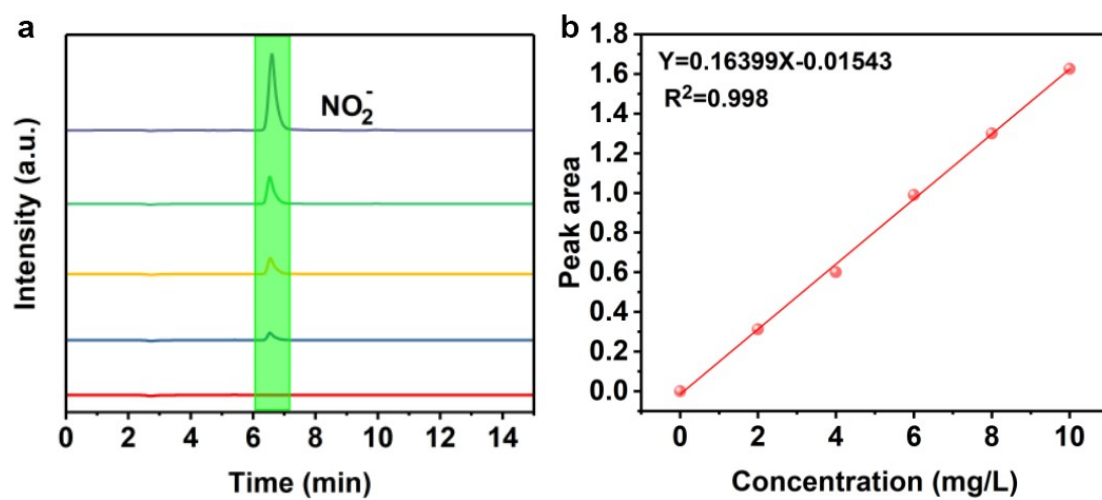

**Fig. S20** Spectra of ion chromatography for ammonia solution with different concentrations (a), the standard curve for  $\text{NO}_2^-$  detection *via* ion chromatography method (b).

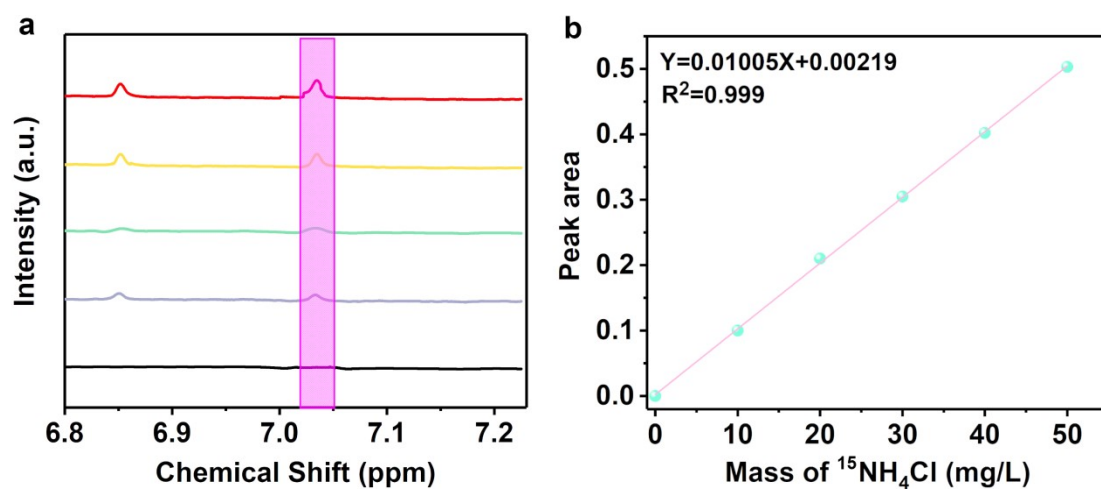

**Fig. S21**  $^1\text{H}$ -NMR spectra of different amount of  $^{15}\text{NH}_4\text{Cl}$  (a), the standard curve of the mass of  $^{15}\text{NH}_4\text{Cl}$  vs. area of peak in  $^1\text{H}$ NMR spectra (b).

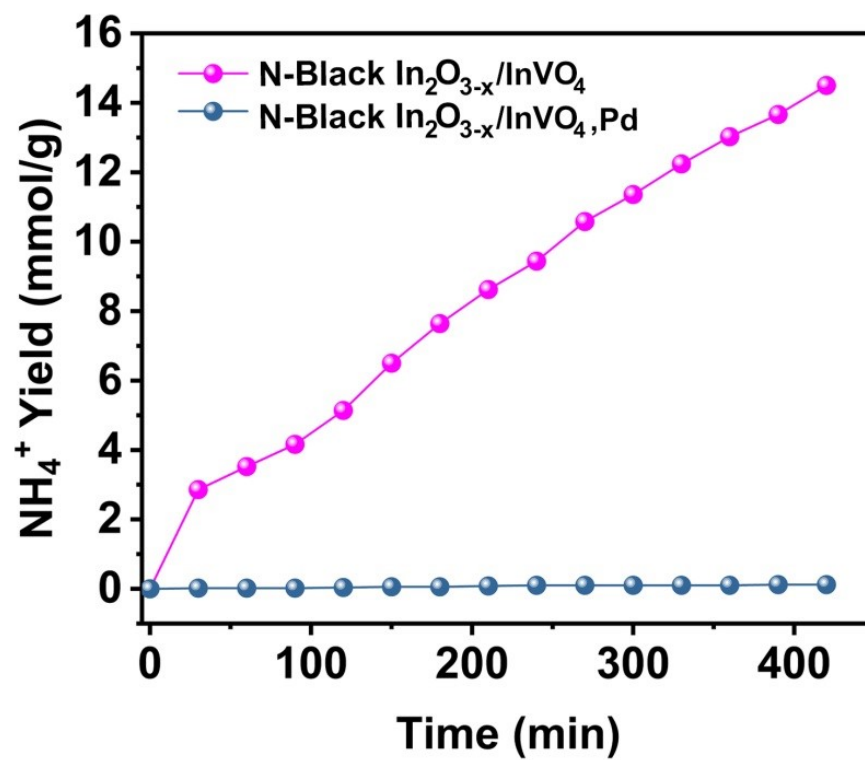

**Fig. S22** Photocatalytic nitrogen fixation tests for N-Black  $\text{In}_2\text{O}_{3-x}/\text{InVO}_4$  heterostructure with or without Pd.

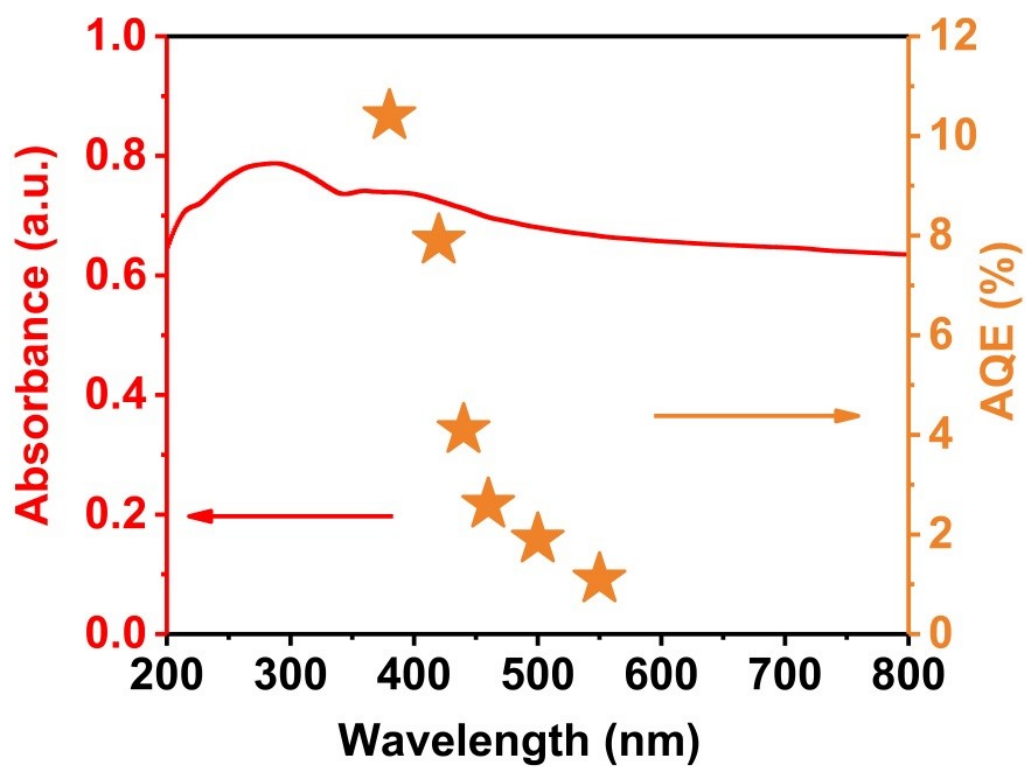

**Fig. S23** The AQE of H<sub>2</sub> evolution for N-Black In<sub>2</sub>O<sub>3-x</sub>/InVO<sub>4</sub> under monochromatic lamp irradiation at different wavelengths.

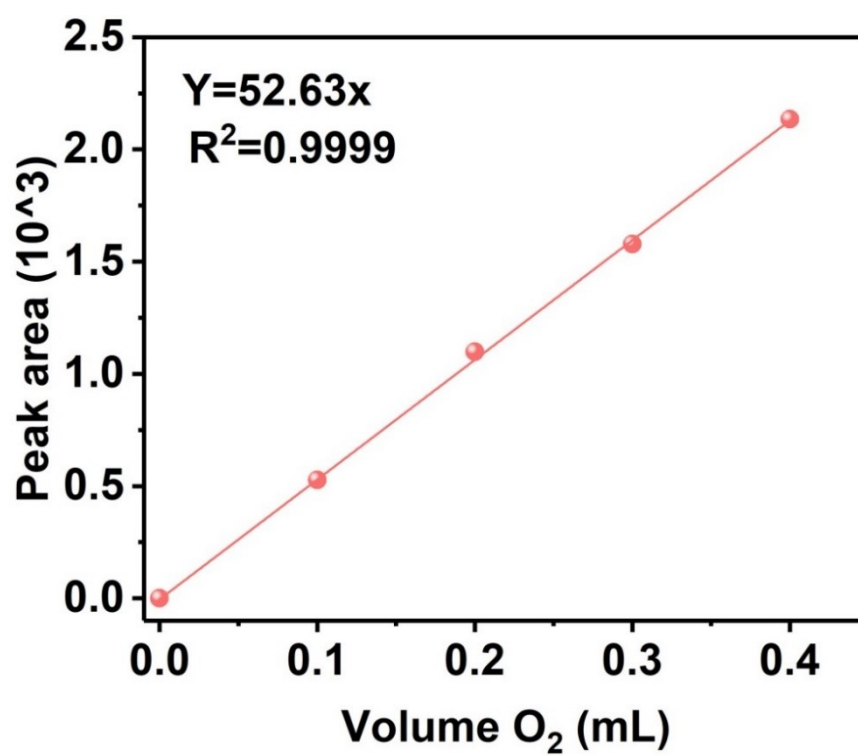

**Fig. S24** The plot of volume of O<sub>2</sub> gas vs. the corresponding chromatographic peak area.

**Table S2.** The calculated ammonia production rates based on different detection methods.

| Catalysts                                                      | Light source        | NH <sub>3</sub> yield (mmol g <sup>-1</sup> h <sup>-1</sup> ) |                   |                   |
|----------------------------------------------------------------|---------------------|---------------------------------------------------------------|-------------------|-------------------|
| N-Black<br>In <sub>2</sub> O <sub>3-x</sub> /InVO <sub>4</sub> | > 400 nm<br>(300 W) | Nessler's reagent                                             | Ion chromatograph | <sup>1</sup> HNMR |
|                                                                |                     | 2.07                                                          | 1.96              | 1.92              |

The NH<sub>4</sub><sup>+</sup> yields are calculated about 2.07 mmol g<sup>-1</sup> h<sup>-1</sup> under visible light by Nessler's reagent method. And the NH<sub>4</sub><sup>+</sup> yields are computed for 1.96 mmol g<sup>-1</sup> h<sup>-1</sup> under visible light by the ion chromatographic data (**Fig. S18**). Furthermore, NH<sub>4</sub><sup>+</sup> yields are calculated about 1.92 mmol g<sup>-1</sup> h<sup>-1</sup> by <sup>1</sup>HNMR method. As a result, the ion chromatography data are in accordance with the results obtained by the Nessler's reagent method. Meanwhile, in the isotope experiment, pure <sup>15</sup>N<sub>2</sub> was employed as a nitrogen source in photocatalytic N<sub>2</sub> fixation process with N-Black In<sub>2</sub>O<sub>3-x</sub>/InVO<sub>4</sub> as catalyst under visible light (**Fig. S30**). A chemical shift of 7.06 ppm, double peaks with a coupling constant of 73.1 Hz was observed, owing to the spin quantum number  $I = 2$  for <sup>15</sup>N<sub>2</sub>.<sup>2</sup> On the contrary, <sup>14</sup>N<sub>2</sub> was also employed as well, a strong triplet signal with a coupling constant of 51.8 Hz was obtained, which strongly confirm that the ammonia in the product comes from the reduction of nitrogen. This result can strongly confirm that the NH<sub>4</sub><sup>+</sup> in the product comes from the reduction of nitrogen.



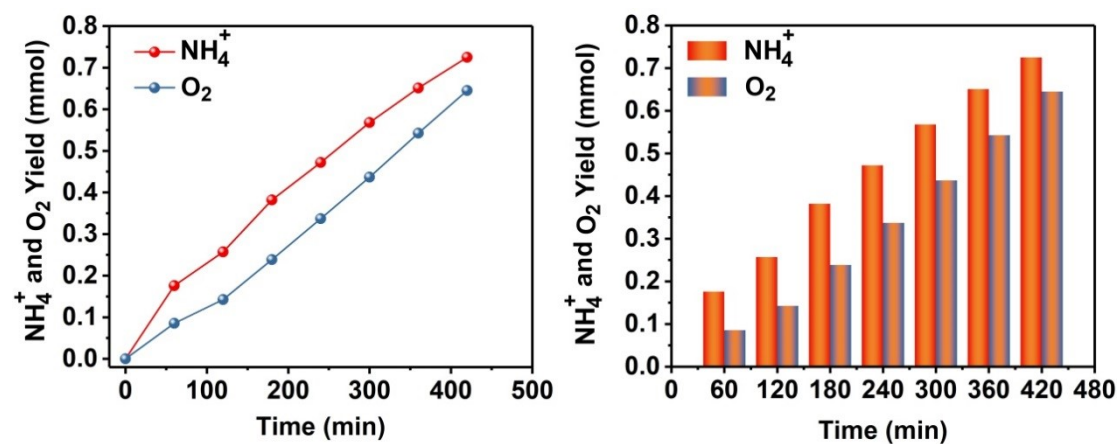

**Fig. S25** Photocatalytic production of  $\text{NH}_3$  and  $\text{O}_2$  during the  $\text{N}_2$  fixation over N-Black  $\text{In}_2\text{O}_{3-x}/\text{InVO}_4$  as the catalyst in pure water without any sacrificial agents.

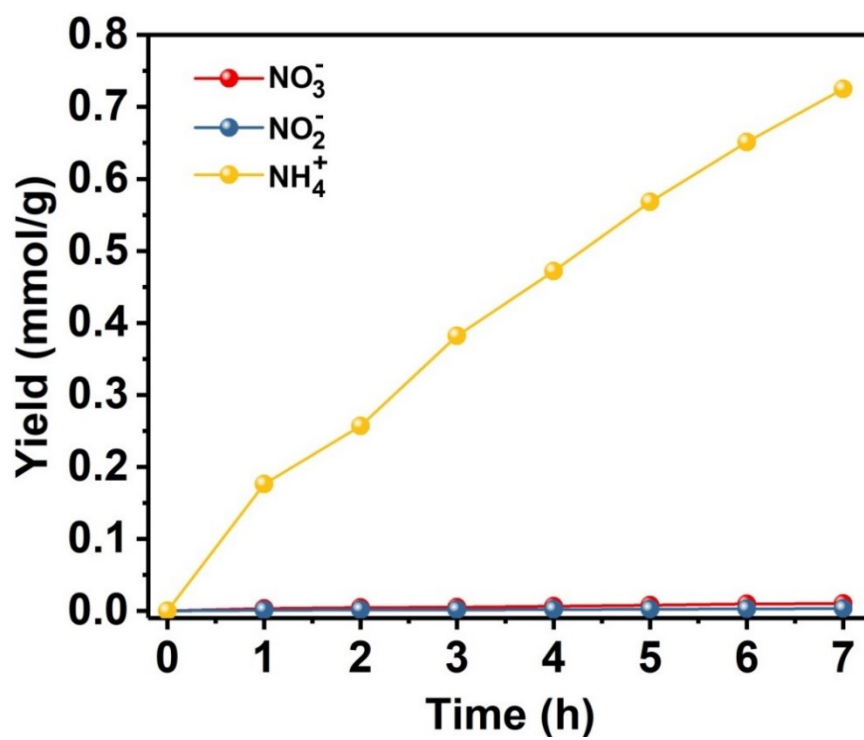

**Fig. S26** Photocatalytic nitrogen fixation to  $\text{NH}_4^+$ ,  $\text{NO}_3^-$  and  $\text{NO}_2^-$  over N-Black  $\text{In}_2\text{O}_3$ .

$\text{x}/\text{InVO}_4$  as detected using ion chromatography.

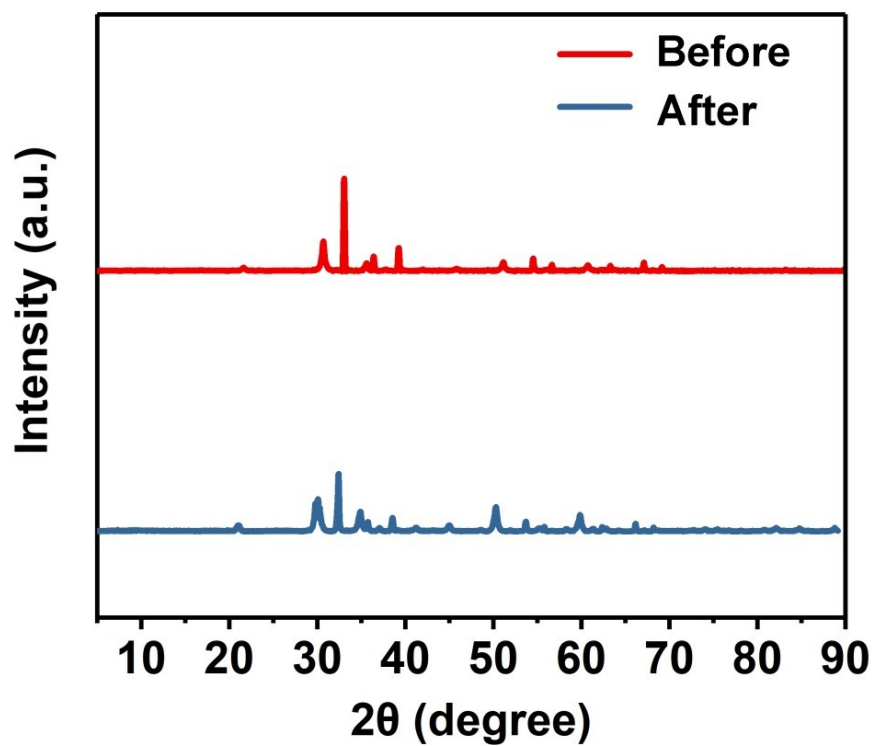

**Fig. S27** XRD patterns of the N-Black  $\text{In}_2\text{O}_{3-x}/\text{InVO}_4$  sample before and after recycling.

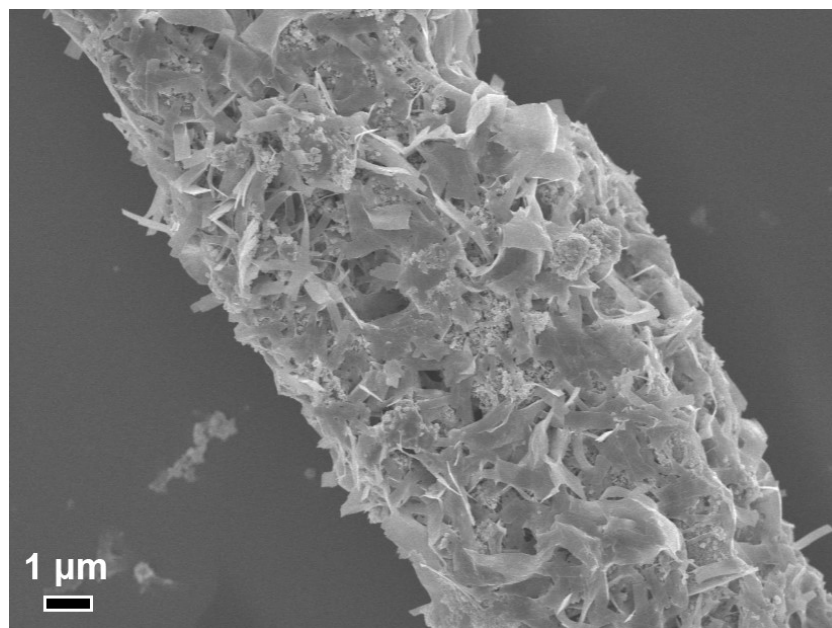

**Fig. S28** The SEM image of the N-Black  $\text{In}_2\text{O}_{3-x}/\text{InVO}_4$  sample after recycling.

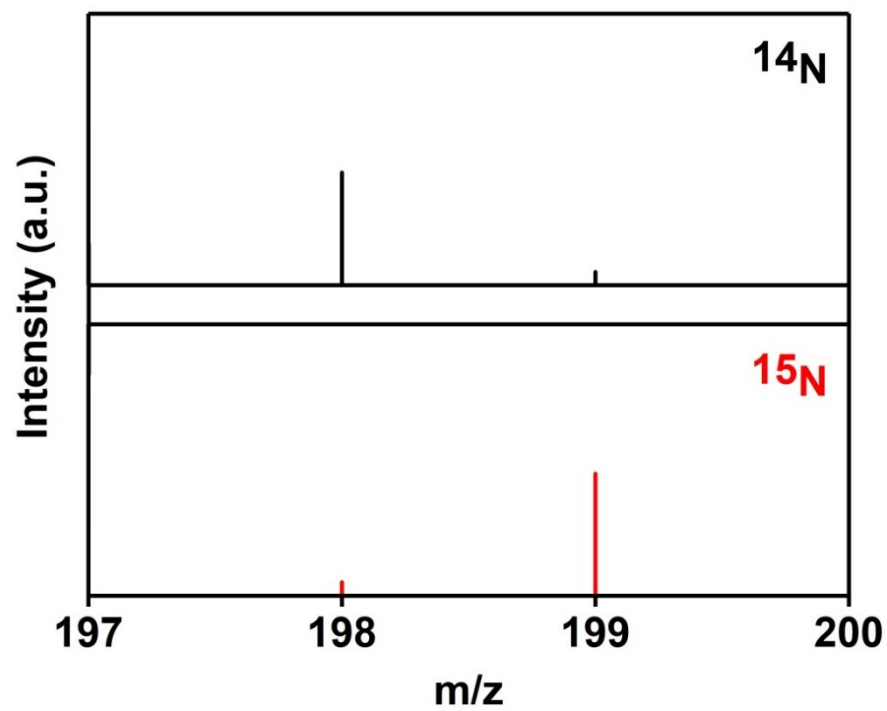

**Fig. S29** Mass spectra of the products formed via reaction with indophenol in different reaction atmospheres over N-Black  $\text{In}_2\text{O}_{3-x}/\text{InVO}_4$ .

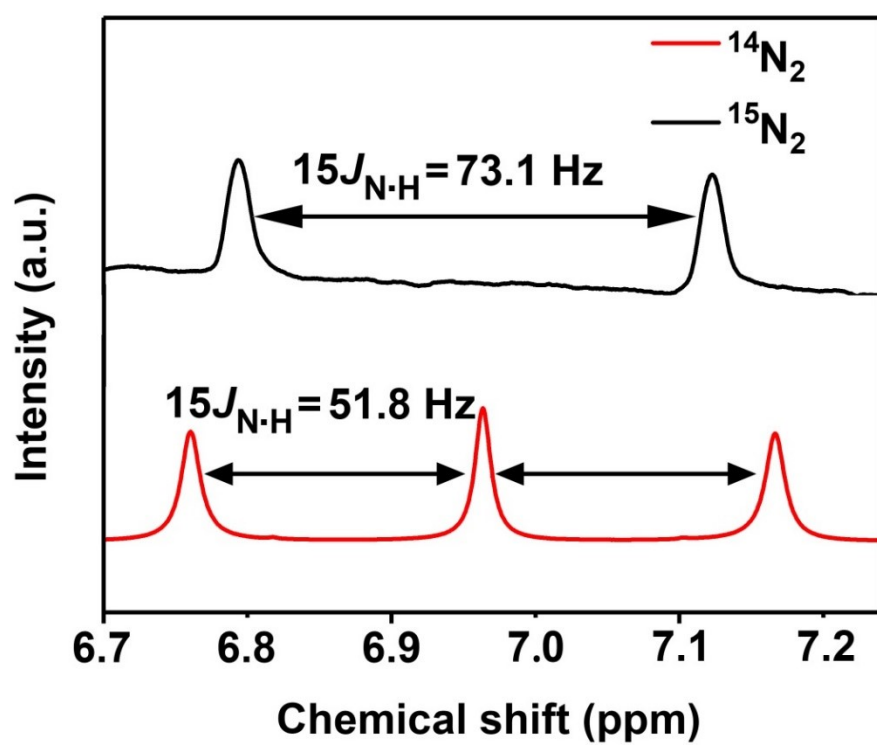

**Fig. S30**  $^1\text{H}$ NMR spectra for produced  $\text{NH}_4^+$  over N-Black  $\text{In}_2\text{O}_{3-x}/\text{InVO}_4$  using  $^{15}\text{N}_2$  and  $^{14}\text{N}_2$  as feeding gas.

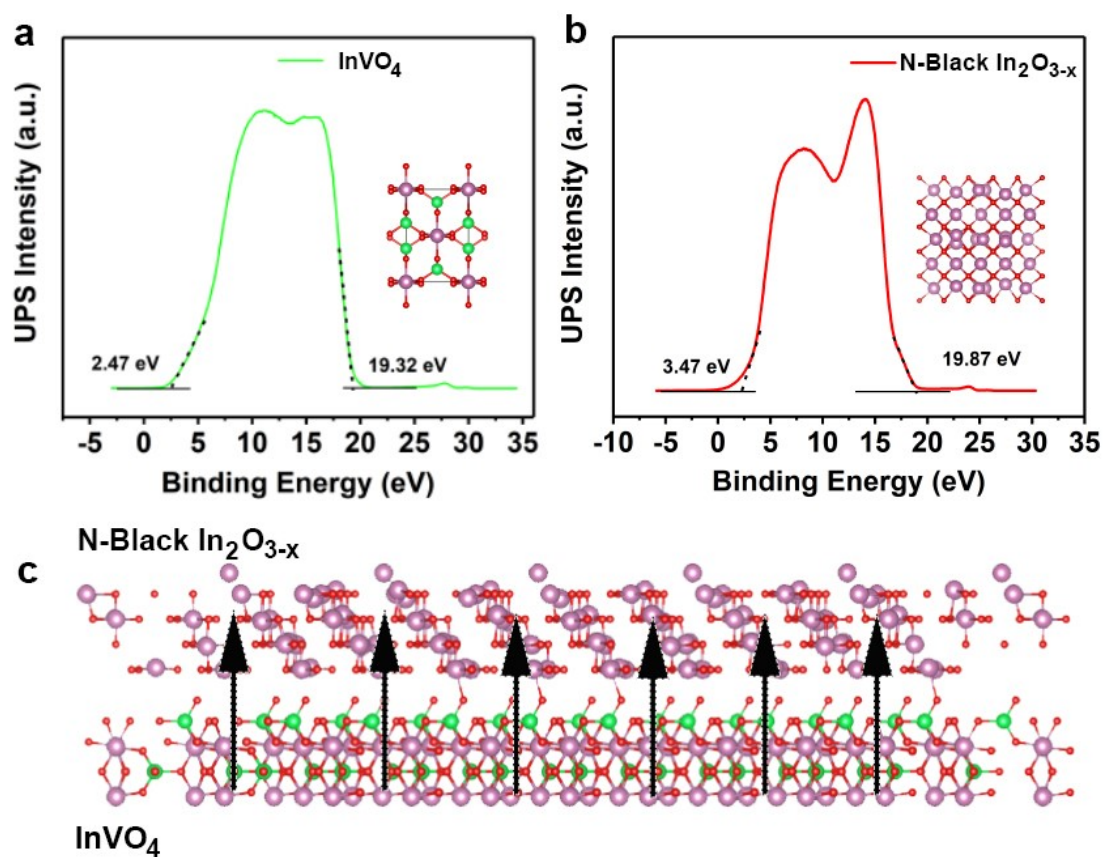

**Fig. S31** UPS spectra of  $\text{InVO}_4$  (a),  $\text{N-Black In}_2\text{O}_{3-x}$  (b) and heterojunction model of  $\text{N-Black In}_2\text{O}_{3-x}/\text{InVO}_4$  (c).

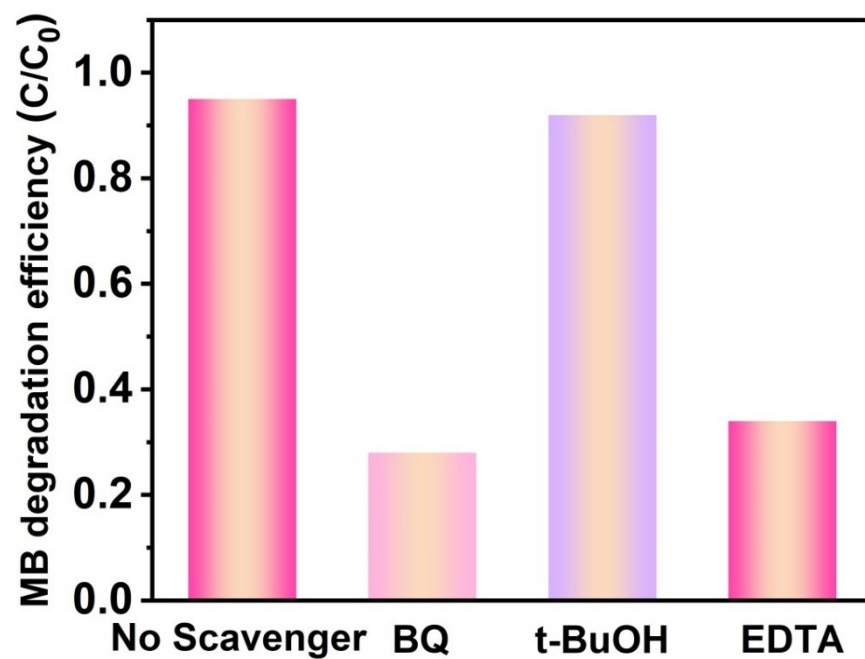

**Fig. S32** Photocatalytic activity of N-Black  $\text{In}_2\text{O}_{3-x}/\text{InVO}_4$  for the photocatalytic degradation of MB in the presence of different scavengers.



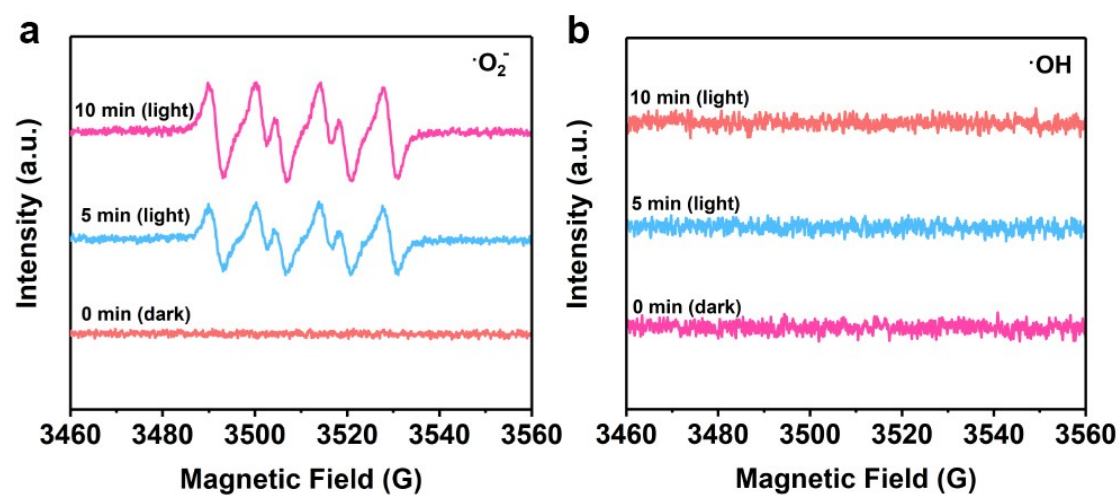

**Fig. S33** ESR spectra of N-Black  $\text{In}_2\text{O}_{3-x}/\text{InVO}_4$  for  $\cdot\text{O}_2^-$  (a) and  $\cdot\text{OH}$  (b) detection.

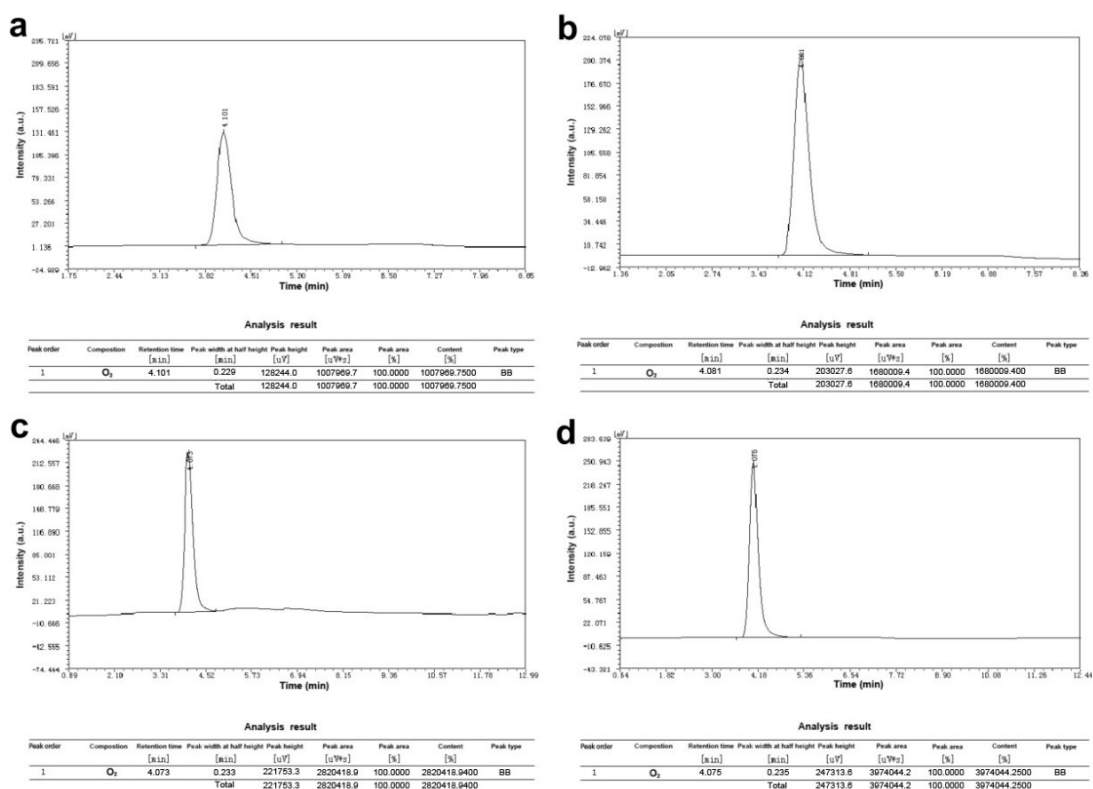

**Fig. S34** Evolutions of O<sub>2</sub> production of N-Black In<sub>2</sub>O<sub>3-x</sub>/InVO<sub>4</sub> sample for 1 h (a), 2 h (b), 3 h (c), and 4 h (d) under visible-light irradiation.

## References

- 1 J. Liu, J. Zhang, D. Wang, D. Li, J. Ke, S. Wang, S. Liu, H. Xiao and R. Wang, *ACS Sustainable Chem. Eng.*, 2019, **7**, 12428-12438.
- 2 Y. Liao, J. Qian, G. Xie, Q. Han, W. Dang, Y. Wang, L. Lv, S. Zhao, L. Luo, W. Zhang, H.-Y. Jiang and J. Tang, *Appl. Catal. B* 2020, **273**, 119054.
